# Supplementary material for: Novel G1481V and Q1491H SCN5A Mutations Linked to Long QT Syndrome Destabilize the Nav1.5 Inactivation State
Source: PubMed Central journal article supplement — CJC Open. 2020 Oct 5;3(3):256–66. doi: 10.1016/j.cjco.2020.09.023 (PMC7984979; doi:10.1016/j.cjco.2020.09.023), 2020-10-05
Supplement: mmc1.pdf [file mmc1.pdf]

Supplemental Table S1  
List of cardiomyopathy (CM) and arrhythmia syndrome (AS) causative genes tested.

| Gene            | NM number                   | Associated-Pathology* | Gene               | NM number                | Associated-Pathology* |
|-----------------|-----------------------------|-----------------------|--------------------|--------------------------|-----------------------|
| <i>ABCC9</i>    | NM_005691.2                 | CM                    | <i>LAMP2</i>       | NM_002294.2              | CM                    |
| <i>ACTC1</i>    | NM_005159.4                 | CM                    | <i>LDB3 (ZASP)</i> | NM_007078.2              | CM                    |
| <i>ACTN2</i>    | NM_001103.2                 | CM                    | <i>LMNA</i>        | NM_170707.2              | CM                    |
| <i>AKAP9</i>    | NM_005751.4                 | AS                    | <i>RANGRF</i>      | NM_016492.4              | AS                    |
| <i>ANK2</i>     | NM_001148.4                 | AS                    | <i>MYBPC3</i>      | NM_000256.3              | CM                    |
| <i>ANKRD1</i>   | NM_014391.2                 | CM                    | <i>MYH6</i>        | NM_002471.3              | CM                    |
| <i>BAG3</i>     | NM_004281.3                 | CM                    | <i>MYH7</i>        | NM_000257.2              | CM                    |
| <i>CACNA1C</i>  | NM_001167625.1; NM_199460.3 | AS                    | <i>MYL2</i>        | NM_000432.3              | CM                    |
| <i>CACNA2D1</i> | NM_000722.2                 | AS                    | <i>MYL3</i>        | NM_000258.2              | CM                    |
| <i>CACNB2</i>   | NM_000724                   | AS                    | <i>MYLK2</i>       | NM_033118.3              | CM                    |
| <i>CALM1</i>    | NM_006888.4                 | AS                    | <i>MYOZ2</i>       | NM_016599.3              | CM                    |
| <i>CALM2</i>    | NM_001743.4                 | AS                    | <i>MYPN</i>        | NM_032578.3              | CM                    |
| <i>CALM3</i>    | NM_005184.2                 | AS                    | <i>NEXN</i>        | NM_144573.3              | CM                    |
| <i>CALR3</i>    | NM_145046.4                 | CM                    | <i>NKX2-5</i>      | NM_004387.3              | CM                    |
| <i>CASQ2</i>    | NM_001232.3                 | AS                    | <i>NOS1AP</i>      | NM_014697.2              | AS                    |
| <i>CAV3</i>     | NM_001234.4                 | AS                    | <i>NPPA</i>        | NM_006172.3              | AS                    |
| <i>CRYAB</i>    | NM_001885.2                 | CM                    | <i>PDLIM3</i>      | NM_014476.5              | CM                    |
| <i>CSRP3</i>    | NM_003476.3                 | CM                    | <i>PKP2</i>        | NM_004572.3              | AS                    |
| <i>CTNNA3</i>   | NM_013266.3                 | AS                    | <i>PLN</i>         | NM_002667.3              | CM                    |
| <i>DES</i>      | NM_001927.3                 | CM                    | <i>PRKAG2</i>      | NM_016203.3              | CM                    |
| <i>DMD</i>      | NM_004006.2                 | CM                    | <i>PTPN11</i>      | NM_002834.3              | CM                    |
| <i>DPP6</i>     | NM_130797.3                 | AS                    | <i>RAF1</i>        | NM_002880.3              | CM                    |
| <i>DSC2</i>     | NM_024422.3                 | AS                    | <i>RBM20</i>       | NM_001134363.1           | CM                    |
| <i>DSG2</i>     | NM_001943.3                 | AS                    | <i>RYR2</i>        | NM_001035.2              | AS                    |
| <i>DSP</i>      | NM_004415                   | AS                    | <i>SCN10A</i>      | NM_006514.2              | AS                    |
| <i>DTNA</i>     | NM_001390.4                 | CM                    | <i>SCN1B</i>       | NM_001037.4; NM_199037.3 | AS                    |
| <i>EMD</i>      | NM_000117.2                 | CM                    | <i>SCN2B</i>       | NM_004588.4              | AS                    |
| <i>FHL1</i>     | NM_001159702.2              | CM                    | <i>SCN3B</i>       | NM_018400.3              | AS                    |
| <i>FKTN</i>     | NM_006731.2                 | CM                    | <i>SCN4B</i>       | NM_174934.3              | AS                    |
| <i>FLNC</i>     | NM_001458.4                 | CM                    | <i>SCN5A</i>       | NM_198056.2              | AS                    |
| <i>GJA1</i>     | NM_000165.4                 | AS                    | <i>SGCD</i>        | NM_000337.5              | CM                    |
| <i>GJA5</i>     | NM_005266.6                 | AS                    | <i>SLMAP</i>       | NM_007159.2              | AS                    |
| <i>GLA</i>      | NM_000169.2                 | CM                    | <i>SNTA1</i>       | NM_003098.2              | AS                    |
| <i>GPD1L</i>    | NM_015141.3                 | AS                    | <i>TAZ</i>         | NM_000116.3              | CM                    |
| <i>HCN4</i>     | NM_005477.2                 | AS                    | <i>TCAP</i>        | NM_003673.3              | CM                    |
| <i>JPH2</i>     | NM_020433.4                 | CM                    | <i>TGFB3</i>       | NM_003239.2              | AS                    |
| <i>JUP</i>      | NM_002230.2                 | AS                    | <i>TMEM43</i>      | NM_024334.2              | AS                    |
| <i>KCNA5</i>    | NM_002234.3                 | AS                    | <i>TMPO</i>        | NM_003276.2              | CM                    |
| <i>KCND3</i>    | NM_004980.4                 | AS                    | <i>TNNC1</i>       | NM_003280.2              | CM                    |
| <i>KCNE1</i>    | NM_000219.5                 | AS                    | <i>TNNI3</i>       | NM_000363.4              | CM                    |
| <i>KCNE1L</i>   | NM_012282.2                 | AS                    | <i>TNNT2</i>       | NM_001001430.1           | CM                    |
| <i>KCNE2</i>    | NM_172201.1                 | AS                    | <i>TPM1</i>        | NM_001018005.1           | CM                    |
| <i>KCNE3</i>    | NM_005472.4                 | AS                    | <i>TRDN</i>        | NM_006073.3              | AS                    |
| <i>KCNH2</i>    | NM_000238.3                 | AS                    | <i>TRPM4</i>       | NM_017636.3              | AS                    |
| <i>KCNJ2</i>    | NM_000891.2                 | AS                    | <i>TTN</i>         | NM_001256850.1           | CM                    |
| <i>KCNJ5</i>    | NM_000890.3                 | AS                    | <i>TTR</i>         | NM_000371.3              | CM                    |
| <i>KCNJ8</i>    | NM_004982.3                 | AS                    | <i>VCL</i>         | NM_014000.2              | CM                    |
| <i>KCNQ1</i>    | NM_000218.2                 | AS                    |                    |                          |                       |

\* CM: cardiomyopathies, AS: arrhythmia syndromes
